# Supplementary material for: Identification of a DAMP receptor and its cognate peptide ligand in sweet potato (Ipomoea batatas)
Source: Research Square preprint supplement (doi:10.21203/rs.3.rs-2263331/v1), 2022-11-21
Supplement: Supplementary file 1 [file e605b350b6edabce68a6aba4.docx]

**
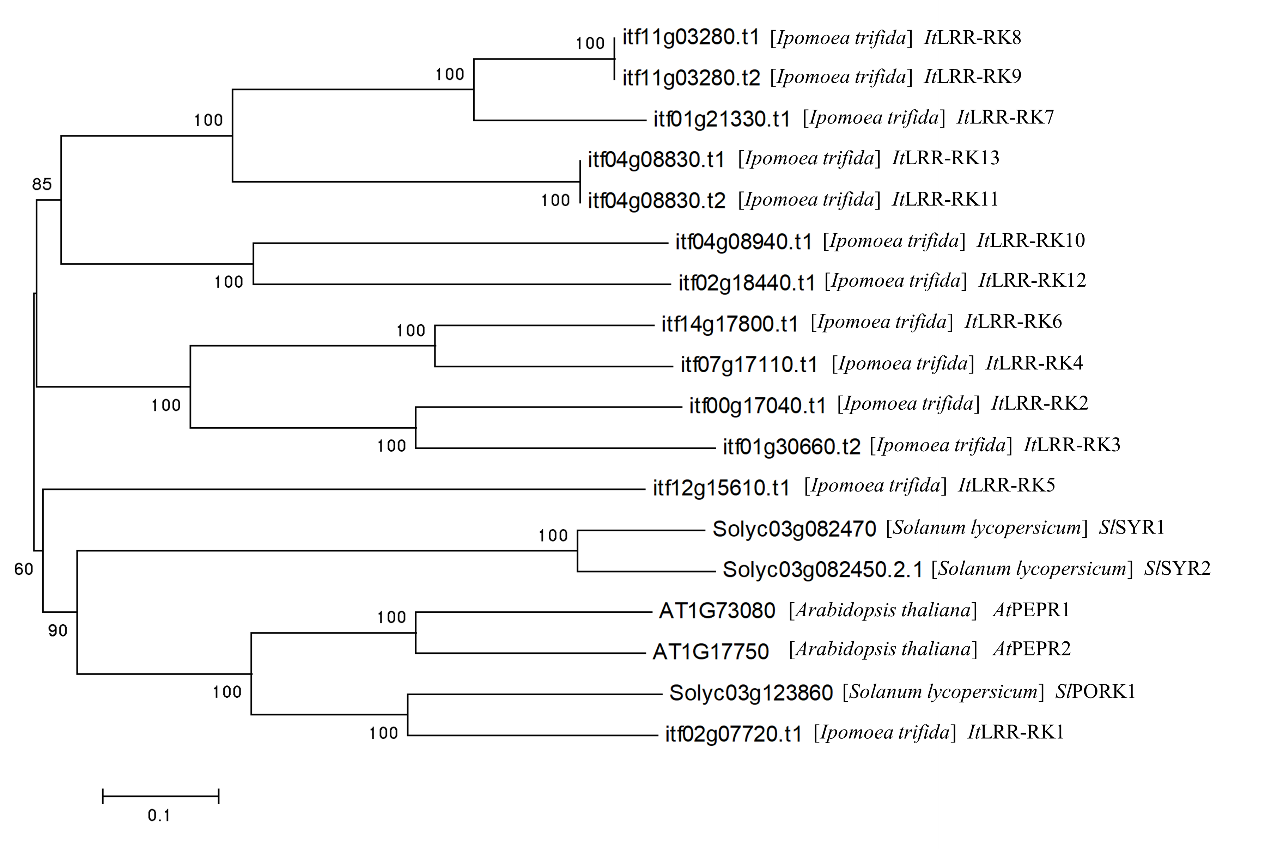
**

**Supplementary Figure 1.**

**Phylogenetic tree (Neighbor-joining) established with *Ipomoea trifida* receptor-like genes.** Sequences were obtained by BLASTx searches with *At*PEPR1/2 and *Sl*SYR1/2 from *Ipomoea trifida* database (<http://sweetpotato.plantbiology.msu.edu/index.shtml>).

**
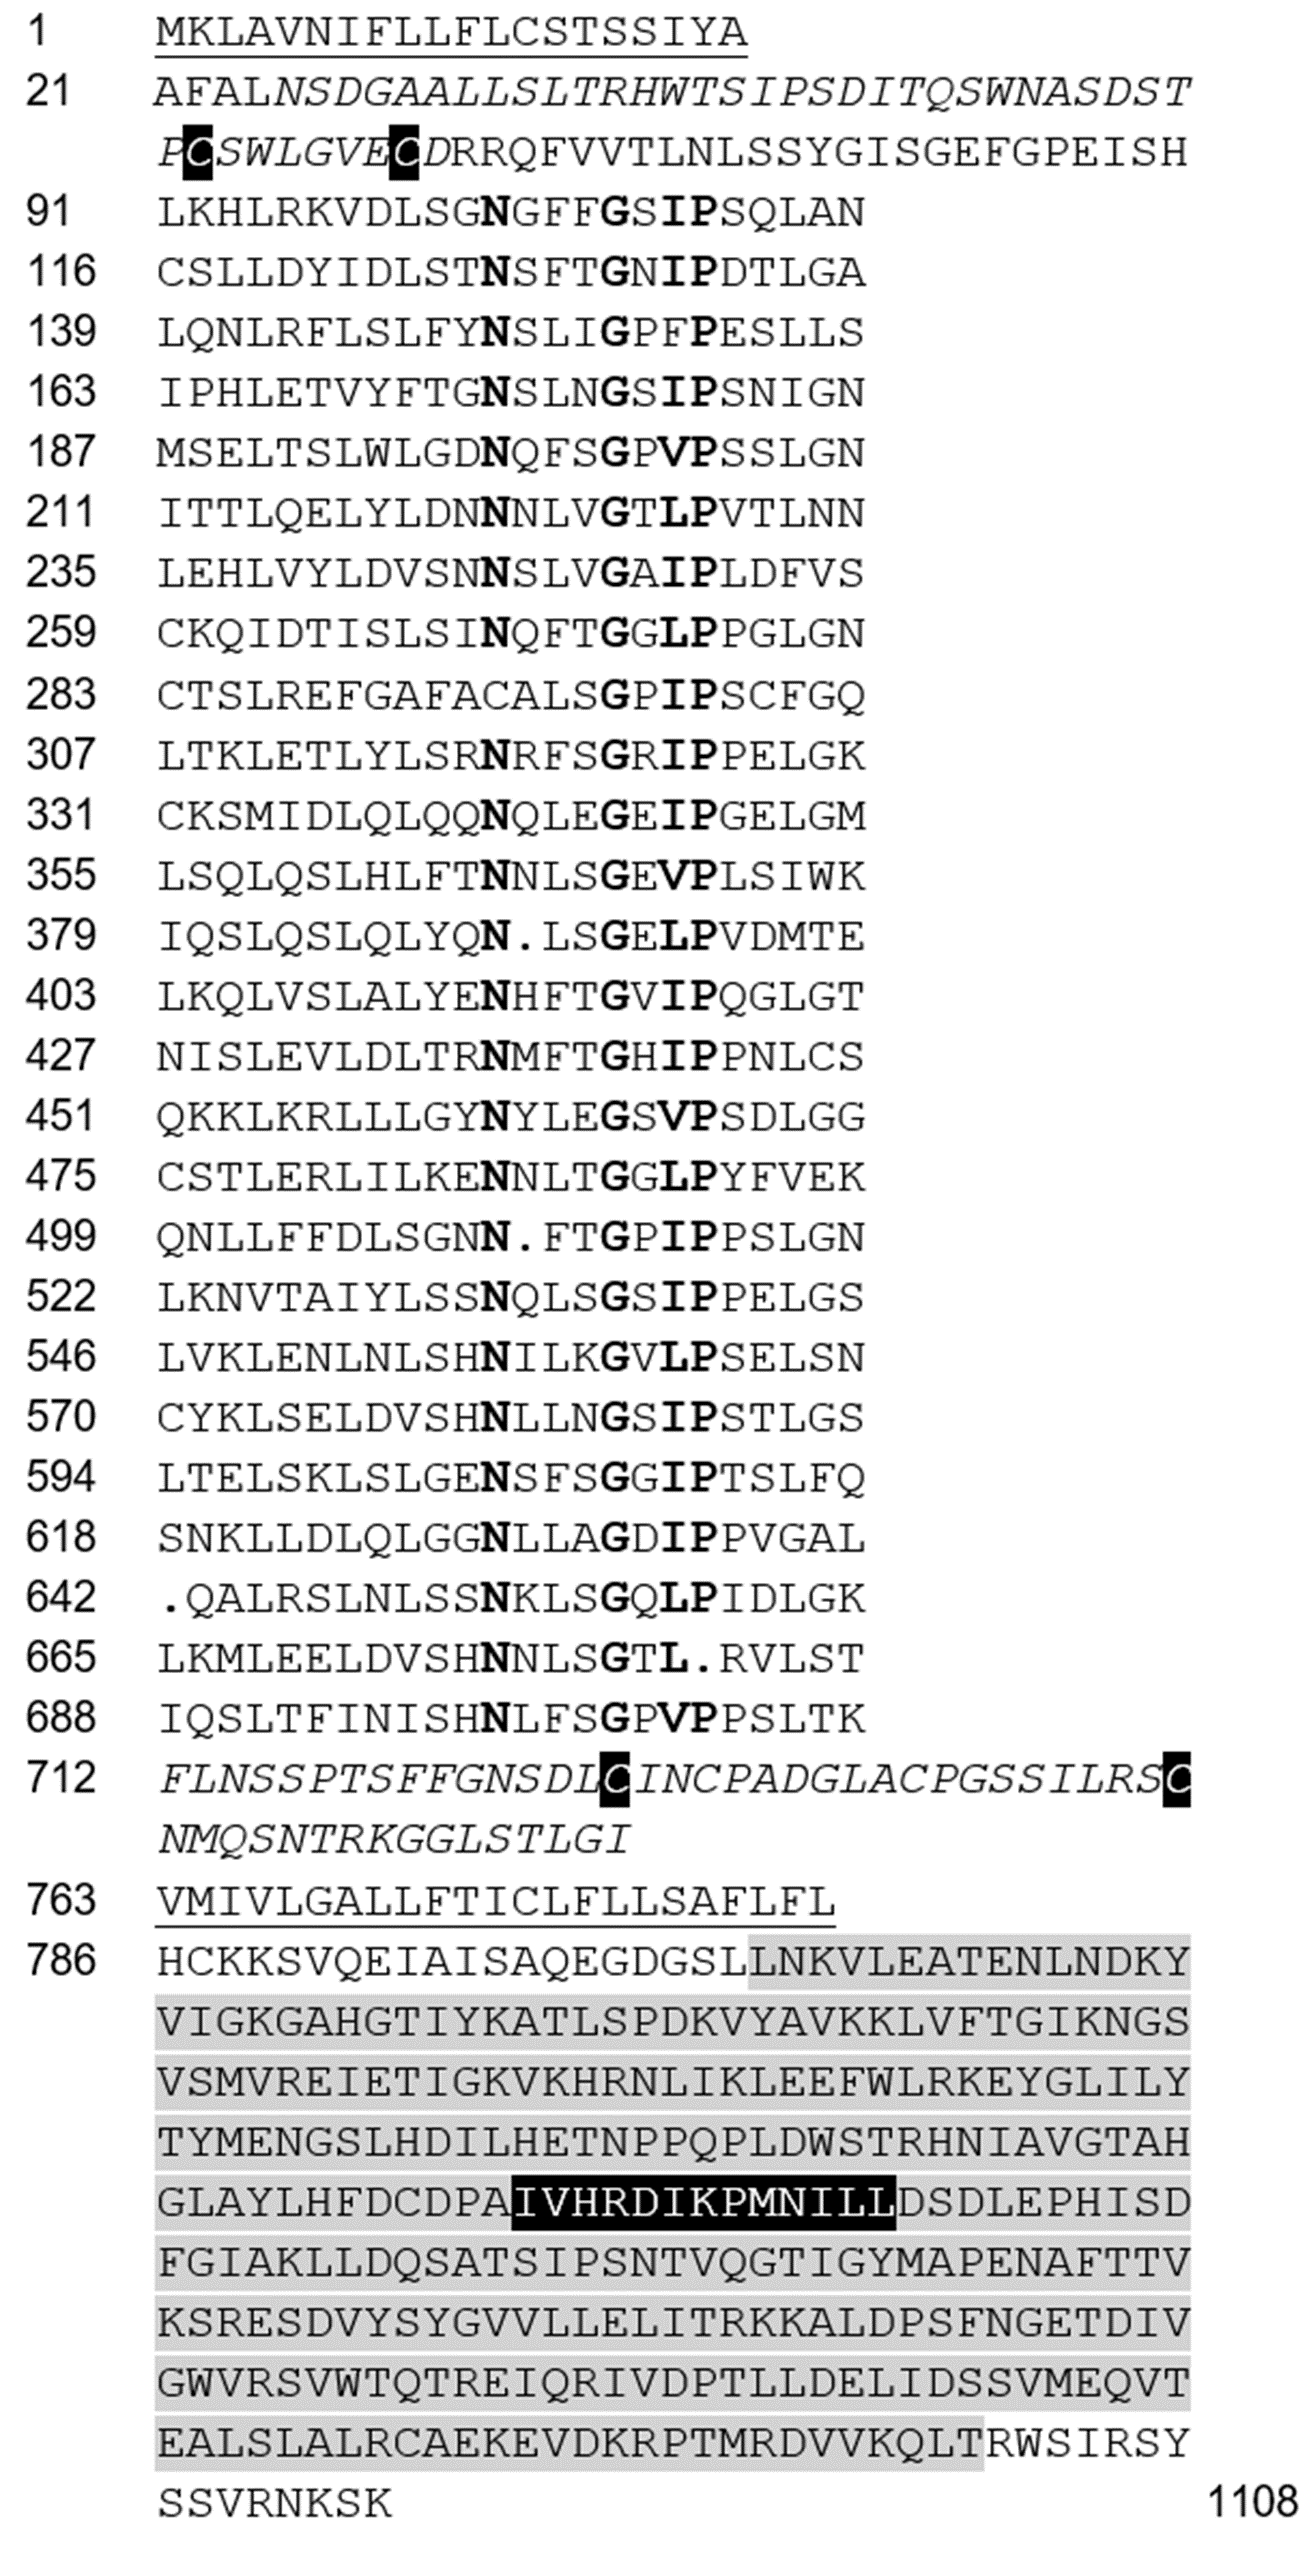
**

**Supplementary Figure 2**

**Primary structure of the LRR receptor kinase *Ib*LRR-RK1 from sweet potato.** The coding sequence of *IbLRR-RK1* encodes a signal peptide (aa 1-20, underlined), the N-terminal cap region (italic) containing two conserved cystein residues (white on black) embedded in the N-terminus (aa 21-90), 26 repetitions of the LRR motif (aa 91-711, highly conserved residues of the consensus sequence of plant LRRs (see 1) are shown in bold letters), the outer juxtamembrane region (aa 712-762) containing two conserved cystein residues (white on black), a transmembrane domain (aa 763-785, underlined), and the cytoplasmic domain (aa 786-1108) including a serine/threonine kinase domain (shaded light gray) with a conserved active site (shaded in black).

**
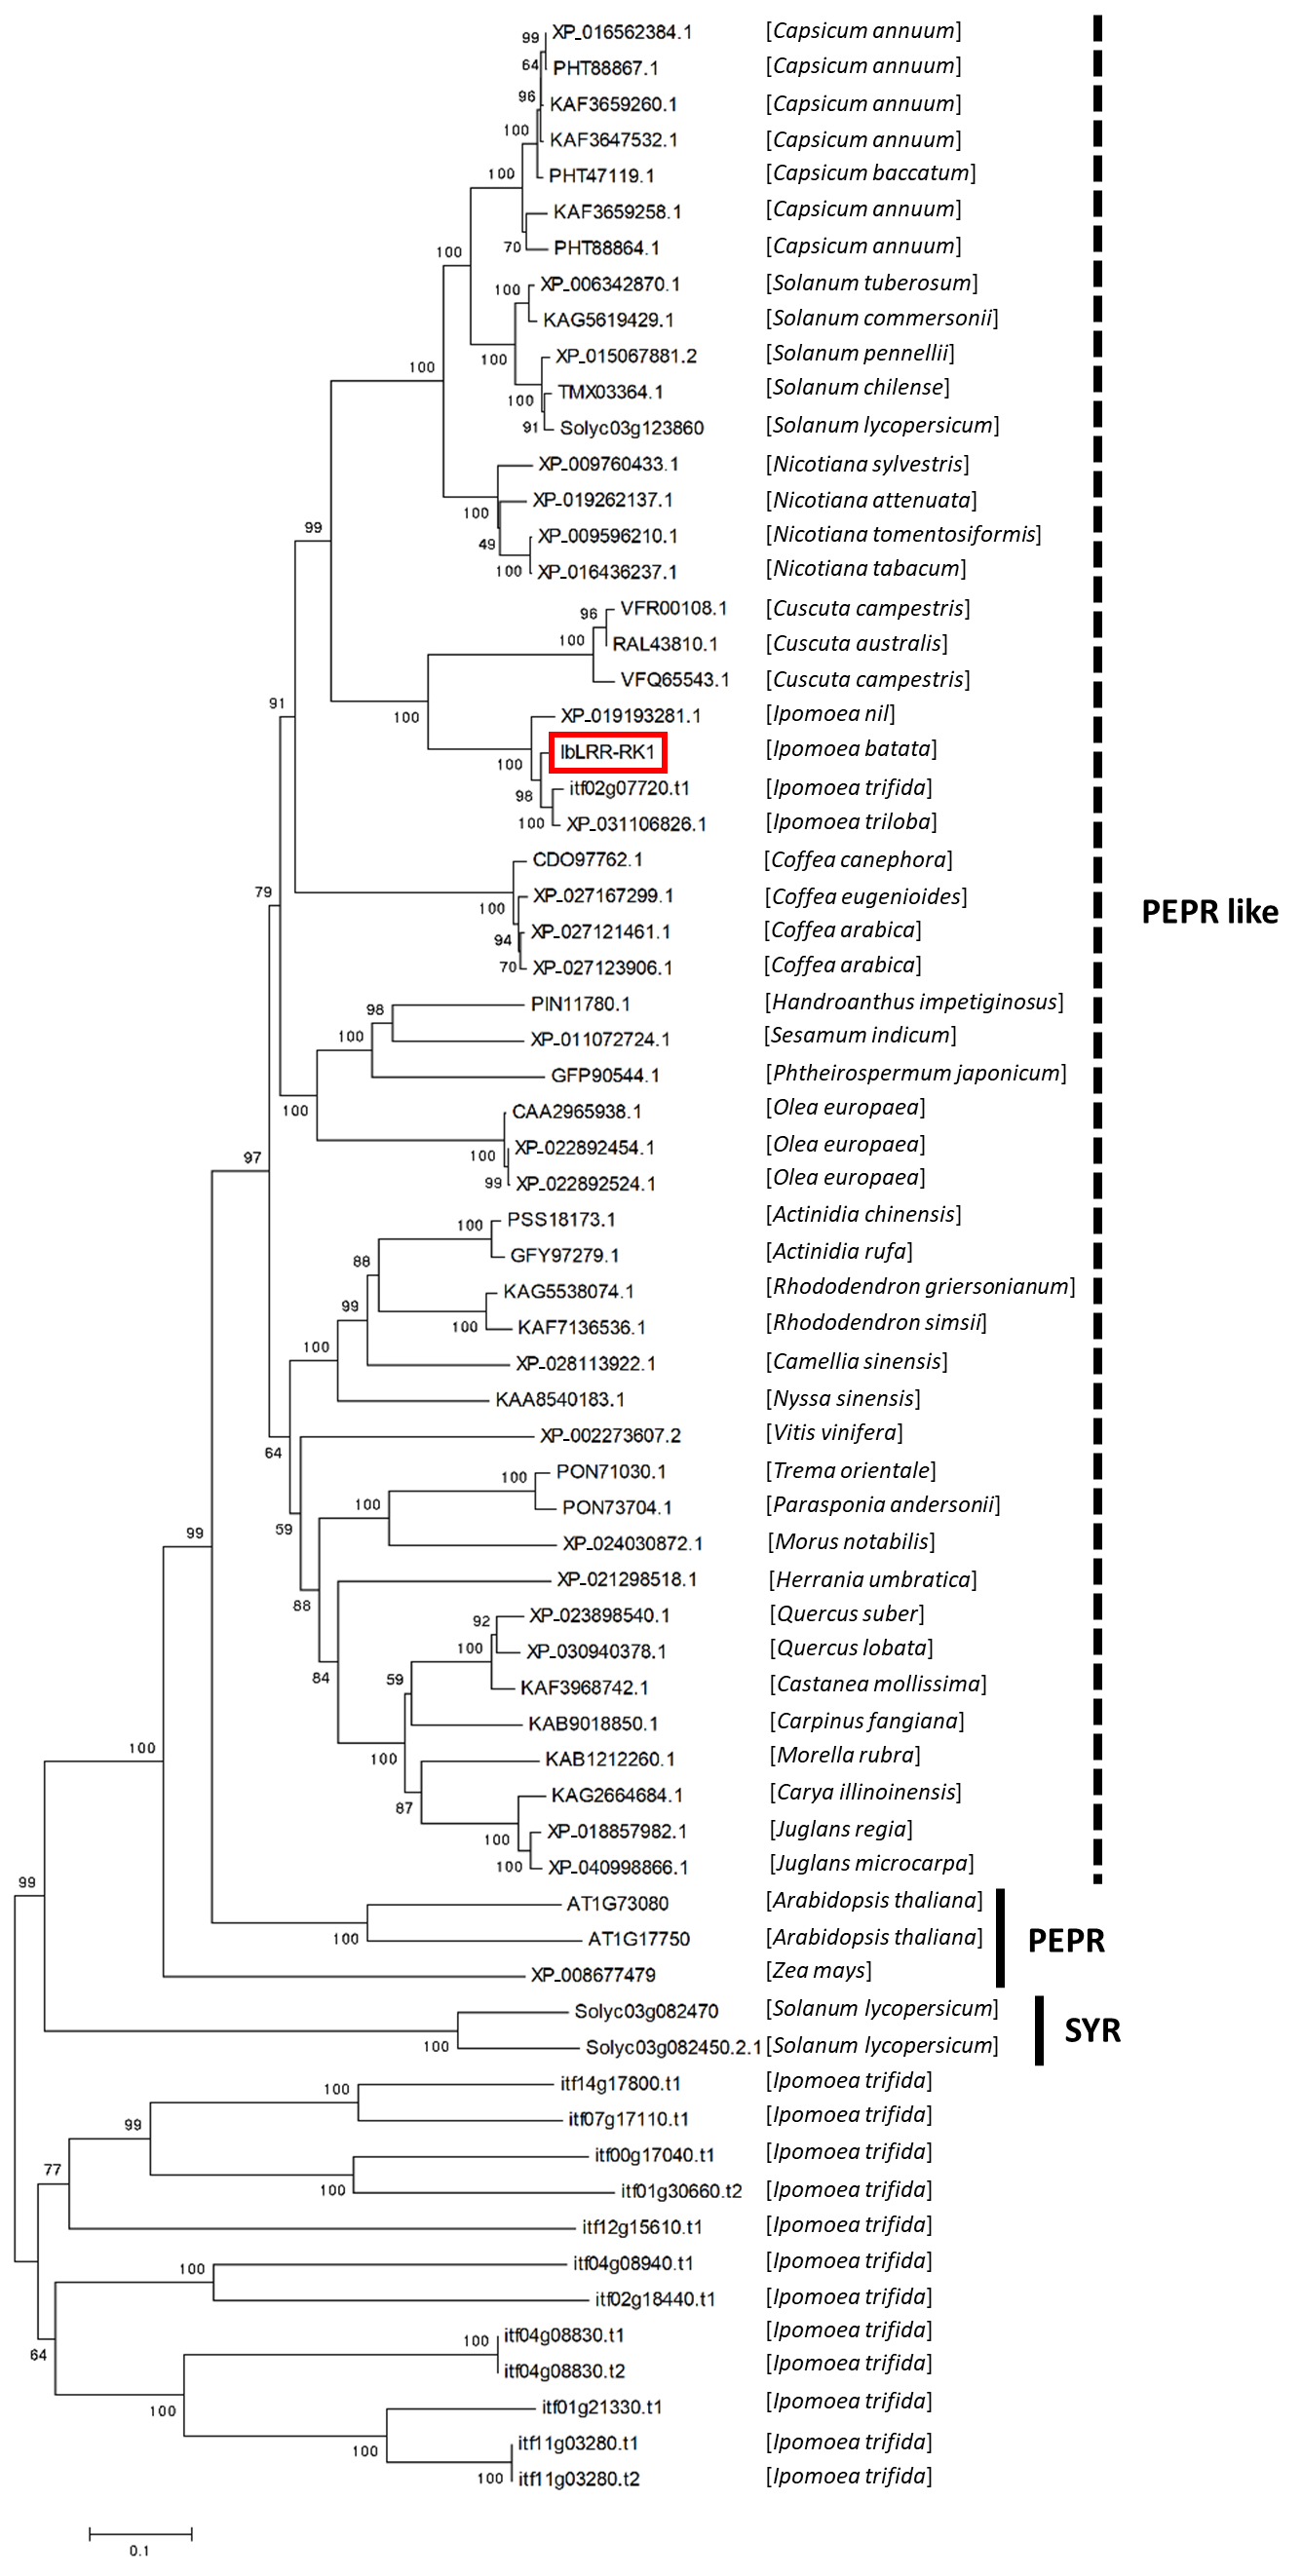
**

**Supplementary Figure 3**

**Phylogenetic tree (Neighbor-joining) established with sequences related to *Ib*LRR-RK1 in different plant species.** Sequences were obtained by BLASTx searches with *Ib*LRR-RK1 in public databases (PubMed/NCBI/Sweetpotato Genomics Resource database).


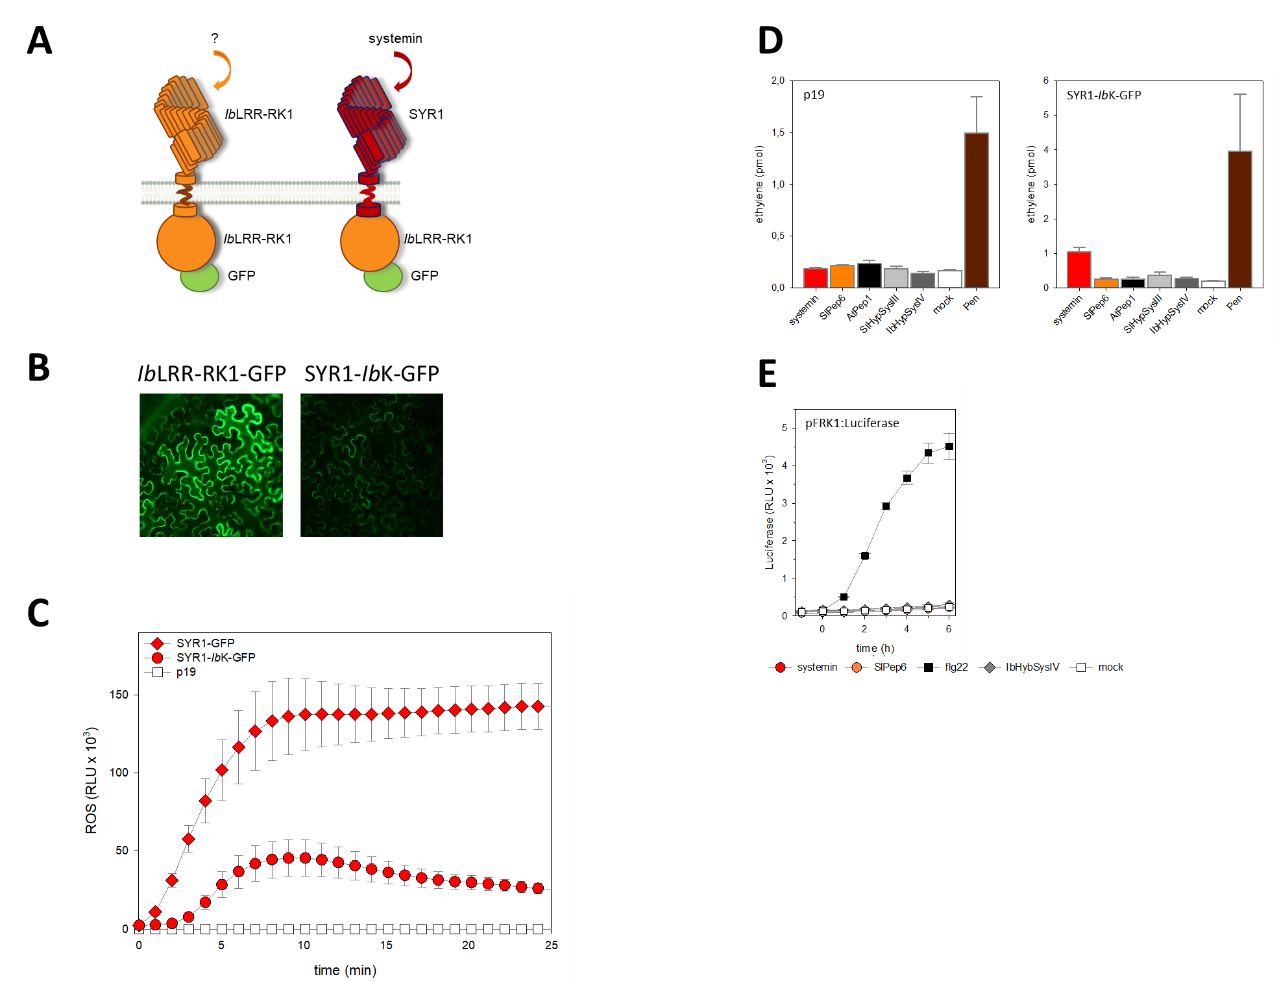


**Supplementary Figure 4**

**Generation of a chimeric receptor version to test for functionality.** The core kinase domain of SYR1 was replaced with the one from *Ib*LRR-RK1 (**A**) and the resulting chimeric protein was transiently expressed in *Nicotiana benthamiana* (**B**, **C**). Reporter assays (**C**) showed that the kinase of *Ib*LRR-RK1 in combination with the SYR1 ectodomain (SYR1-*Ib*K) was able to induce the generation of ROS in the leaf disc assay when treted with 10 nM systemin (red circles), similar to SYR1 (red diamonds). Control leaf pieces (expressing p19 only) did not react with a ROS burst to systemin treatment (open squares). Data are depicted as means ± s.e. of n = 4. (**D**) Controls and additional data to **Figure 2C**: Induced ethylene production in *N. benthamiana* leaf pieces, transiently transformed with p19 only or with p19 and SYR1-*Ib*K-GFP, treated with 1 µM of the listed peptides or 90 ng/ml Pen as a positive control. Values and error bars represent mean ± s.d. of n = 3. (**E**) Control for **Figure 2D and E**: Mesophyll protoplasts from *A. thaliana* Col-0 were transformed with the reporter construct pFRK1:luciferase only and luminescence was monitored after treatment with either 10 nM flg22 (black squares, positive control), systemin (red circles), *Sl*Pep6 (orange circles), or *Ib*HypSysIV (dark gray diamonds) at time point 0, mock control is shown with open squares. Values and error bars represent mean ± s.d. of n = 2.


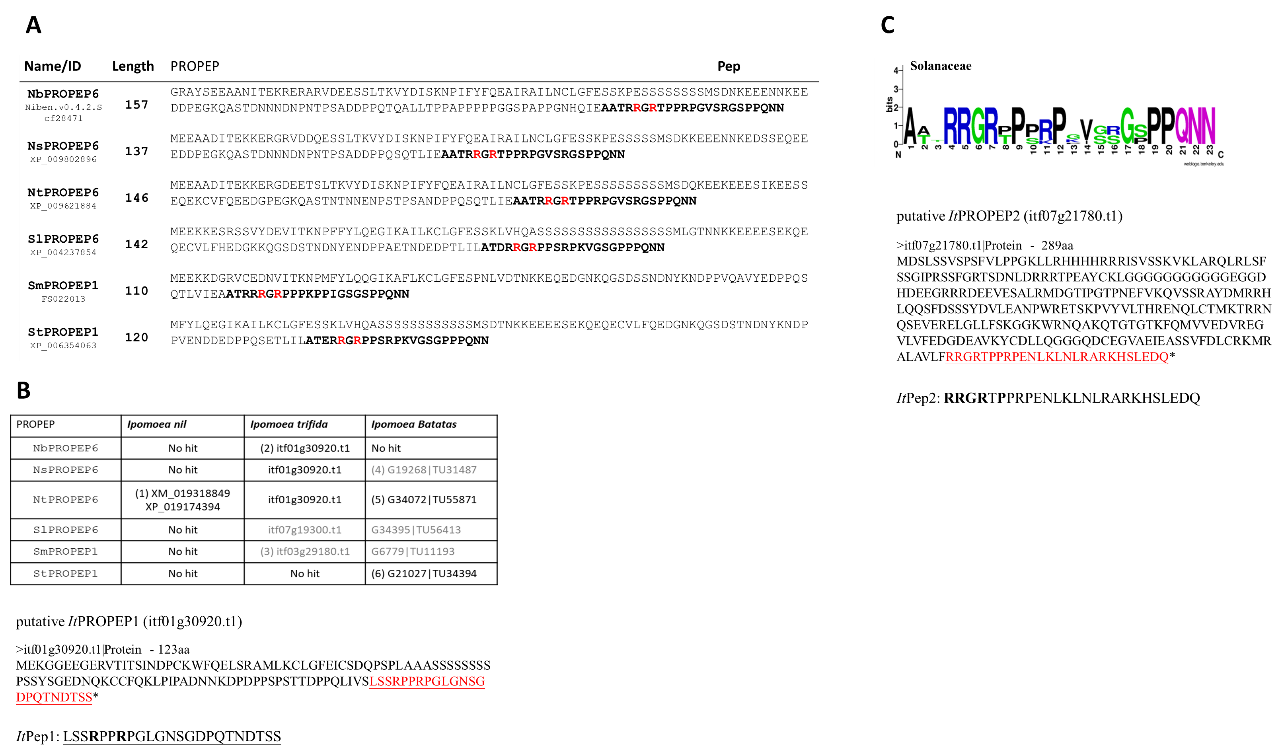


**Supplementary Figure 5**

**Different approaches to identify putative Peps and PROPEPs in sweet potato.**  Sweet potato belongs into the morning glory family (Convolvulaceae), a sister family of the Solanaceae, from which genes encoding PROPEPs have been published 2, including also *Sl*PROPEP6. (**A**) We retrieved the six PROPEPs (Nb, *Nicotiana benthamiana*; Ns, *Nicotiana sylvestris*; Nt, *Nicotiana tomentosiformis*; Sl, *Solanum lycopersicum*; Sm; *Solanum melongena*; St, *Solanum tuberosum*;putative mature Peps, representing the last 23 residues of the precursor proteins, are highlighted in bold) and used them for tBlastn queries of the sweet potato databases (<http://sweetpotato.plantbiology.msu.edu/index.shtml>). (**B**) One gene from *I. trifida* (itf01g30920.t1, putative *It*PROPEP1) was retrieved multiple times. (**C**) A scanning sequence patterns strategy starting with the the consensus sequences of the Solanaceae Pep sequences (as visualized by the WebLogo tool, 3 identified another *I. trifida* gene (itf07g21780.t1, putative *It*PROPEP2).


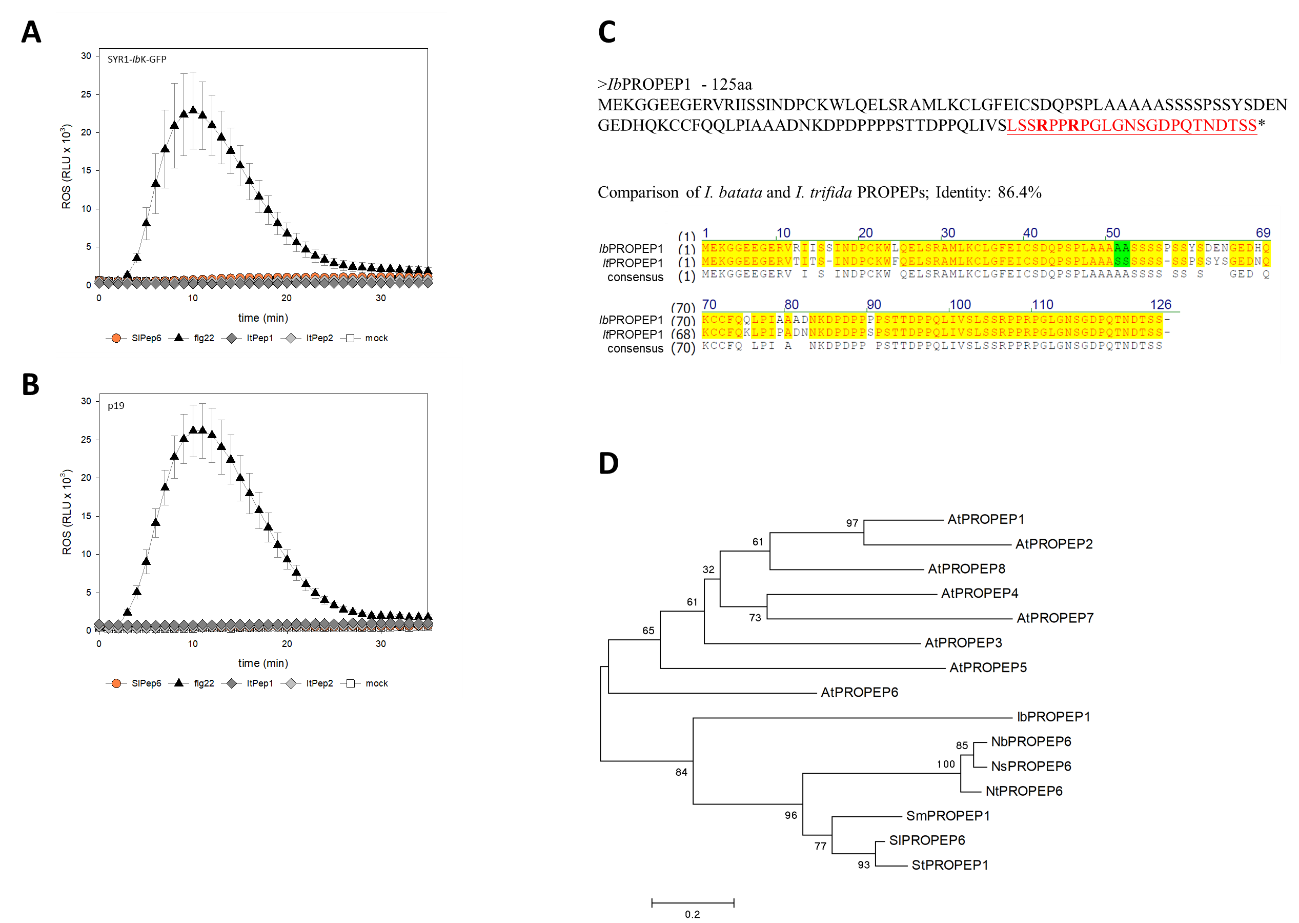


**Supplementary Figure 6**

**Identification of an endogenous ligand for *Ib*LRR-RK.** Control for **Figure 3A**: ROS assays with *N. benthamiana* leaf discs from plants which were transformed with the construct encoding the chimeric receptor SYR1-*Ib*K-GFP and p19 (**A**), or with p19 only (**B**). Data are means ± s.e. of n = 4 after treatment with 1 µM of the respective peptides, or BSA/NaCl-treatment (mock). (**C**) The deduced amino acid sequence of *Ib*PROPEP1 and its derived peptide, *Ib*Pep1 (highlighted in red). The comparison of the PROPEP amino acid sequences from *I. trifida* and *I. batata* reveals an identity of 86,4%, the putative mature 23-mer peptides at the C-terminus are 100% identical. **(D**) Phylogenetic tree (Neighbor-joining) comparing *Ib*PROPEP1 with PROPEPs from different plant species; for the abbreviations see Table S2.

**
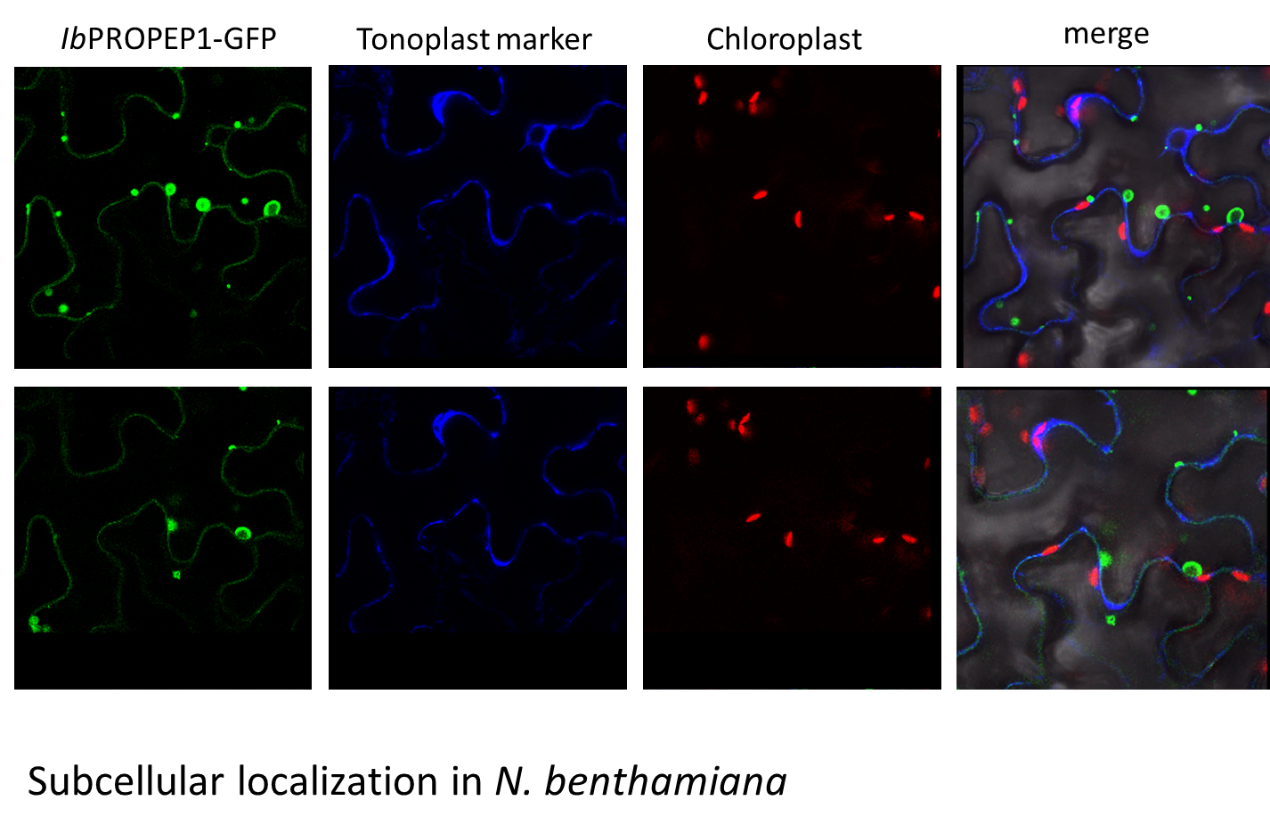
**

**Supplementary Figure 7**

**Subcellular localization of *Ib*PROPEP1 in transgenic *N. benthamiana* leaves.** *N. benthamiana* leaves were transiently transformed with *Ib*PROPEP1-GFP and observed 3 dpi to check the subcellular localization of the expressed protein by confocal microscopy (TCS SP5 Confocal; Leica), in comparison to the tonoplast marker γ-Tip-mCherry 4.

**
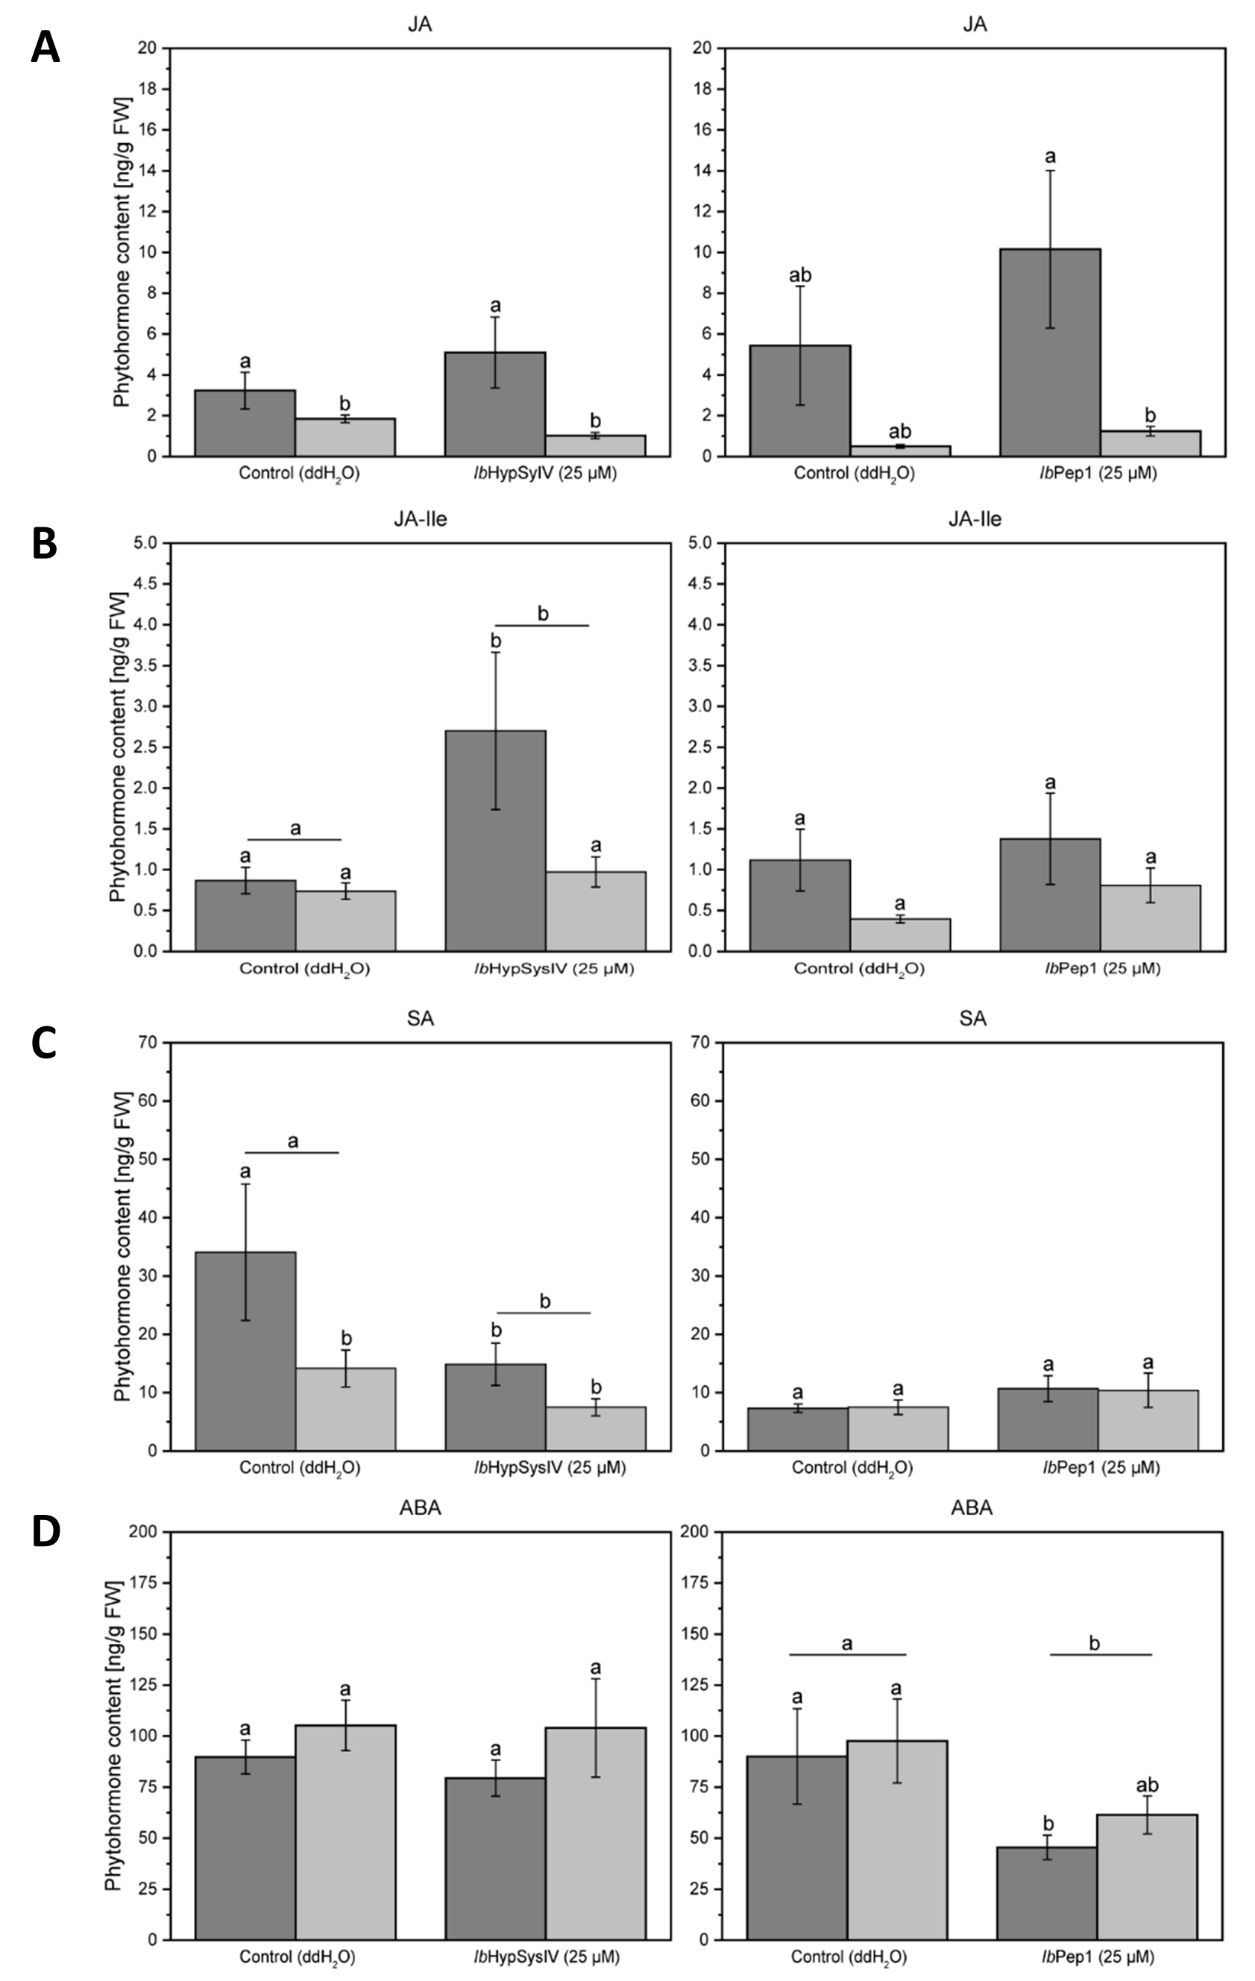
**

**Supplementary Figure 8**

**Opposing phytohormone accumulation patterns in *I. batatas* after treatment with *Ib*HypSysIV and *Ib*Pep1.** Jasmonates (JA, JA-Ile, (**A**, **B**)), salicylic acid (SA, (**C**)), and abscisic acid (ABA, (**D**)) levels after treatmentwith 25 µM *Ib*HypSysIV (left) and *Ib*Pep1 (right), respectively, measured in *I. batatas* TN57 after 1 h. Phytohormone contents were analyzed in the locally treated 3rd leaf (dark gray bars) and the adjacent untreated 4th systemic leaf (light gray bars). Leaves from ddH2O-sprayed plants served as controls. Statistically significant differences between groups were analyzed using a two-way ANOVA with initial normality and equal variance tests. Different letters indicate significant differences among groups for p<0.05, determined by the Holm-Sidak method. For all analyses, phytohormone content was set as the dependent variable with treatment and leaf type as independent variables. Data are presented as mean  ±  s.e. of n = 8.

**
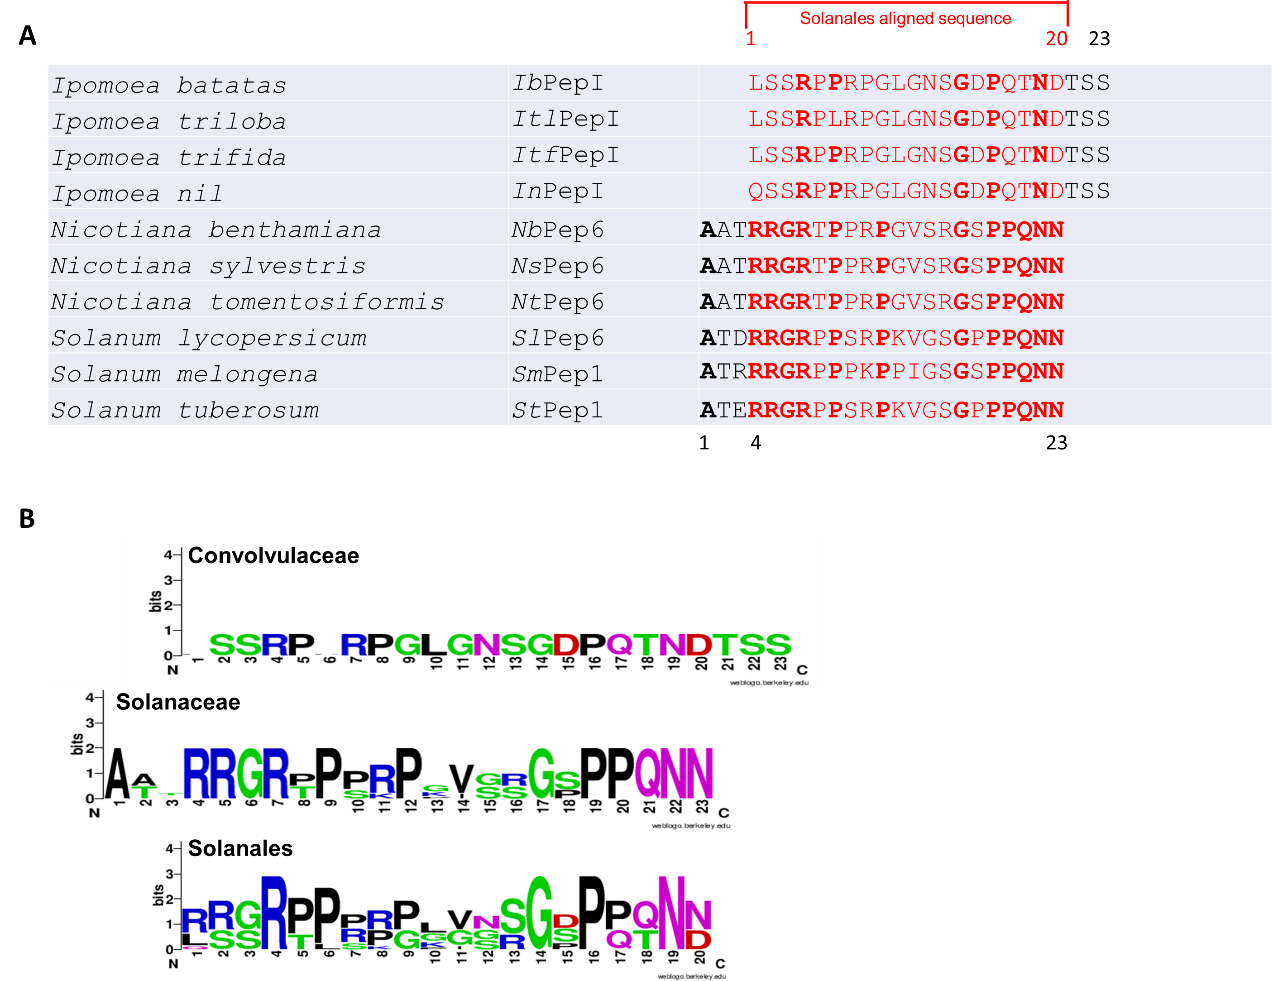
**

**Supplementary Figure 9**

**Comparison of Peps from Solanaceae and Convolvulaceae**. (**A**) Pep sequences from Solanales which were used for the analysis of the consensus sequences. (**B**) The consensus sequences of Convolvulaceae (*Ib*Pep1, *It*lPep1, *Itf*Pep1, *In*Pep1) and Solanaceae (*Nb*Pep6, *Ns*Pep6, *Nt*Pep6, *Sl*Pep6, *Sm*Pep6, *St*Pep6) Peps are compared to the combined consensus (for which only the overlapping 20 residues were used) by generating WebLogos 3.

**
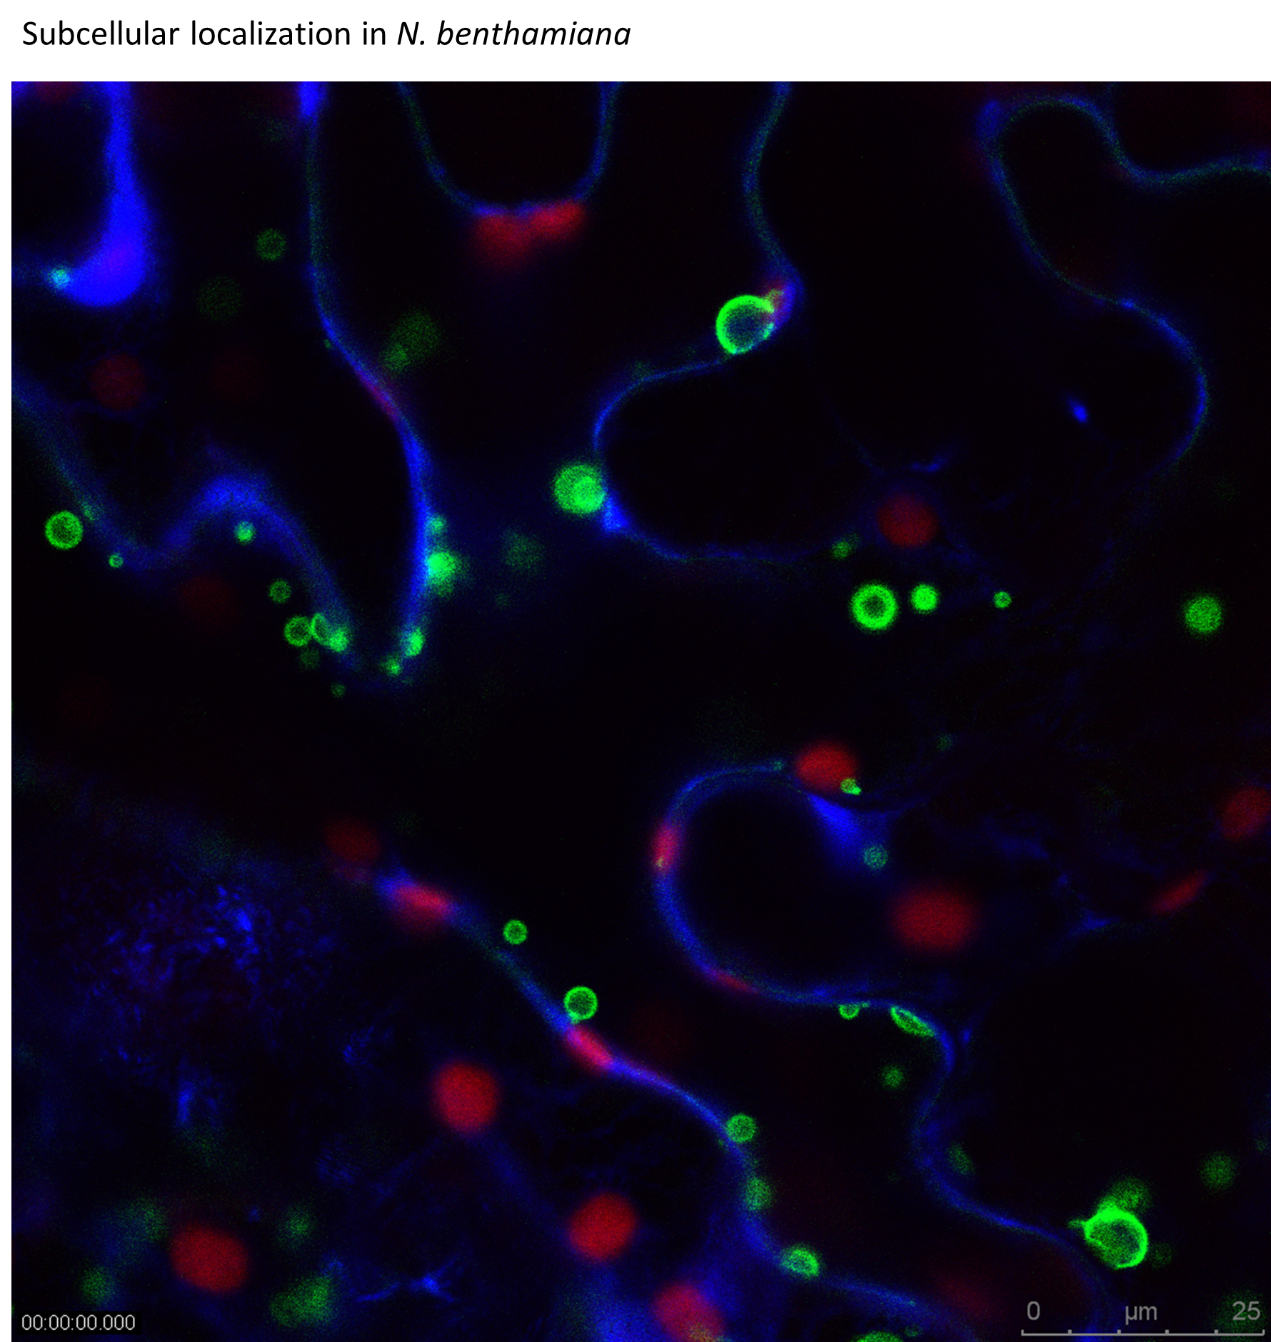
**

**Supplementary Movie 1**

**GFP-tagged *Ib*PROPEP1 moves in vesicles.**

*N. benthamiana* leaves were transiently transformed with *Ib*PROPEP1-GFP. A leaf sample was observed to check the subcellular localization and movement of the *Ib*PROPEP1 by confocal microscopy (TCS SP5 Confocal; Leica). Tonoplast was visualized by co-transformation with the tonoplast marker γ-Tip-mCherry 4.

**Supplementary Table 1. List of peptides used for signaling activity experiments.**

| Name | Sequence |
| --- | --- |
| systemin | AVQSKPPSKRDPPKMQTD |
| *Ib*HypSysIV | REEKPOOOAOETDDPNRP |
| C*-Ib*HypSysIV | CREEKPOOOAOETDDPNRP |
| *Ib*Pep1 | LSSRPPRPGLGNSGDPQTNDTSS |
| *Sl*Pep6 | ATDRRGRPPSRPKVGSGPPPQNN |
| *Sl*HypSysIII | GRHDSVLPPPSPKTD |
| *At*Pep1 | ATKVKAKQRGKEKVSSGRPGQHN |
| Scrambled peptide | PEROEDDNEOPKORPC |

**Supplementary Table 2. Identity table of *Ib*Pep1 and other Peps by Vector NTI.**

|  | *At*Pep1 | *At*Pep2 | *At*Pep8 | *At*Pep6 | ***Ib*PepI** | *Nb*Pep6 | *Ns*Pep6 | *Nt*Pep6 | *Sl*Pep6 | *St*Pep1 | *Sm*Pep1 | *At*Pep3 | *At*Pep5 | *At*Pep4 | *At*Pep7 |
| --- | --- | --- | --- | --- | --- | --- | --- | --- | --- | --- | --- | --- | --- | --- | --- |
| *At*Pep1 |  | 65 | 43 | 43 | **10** | 30 | 30 | 30 | 39 | 39 | 35 | 39 | 39 | 35 | 35 |
| *At*Pep2 |  |  | 52 | 35 | **21** | 22 | 22 | 22 | 26 | 26 | 26 | 43 | 30 | 39 | 30 |
| *At*Pep8 |  |  |  | 30 | **16** | 22 | 22 | 22 | 22 | 22 | 17 | 35 | 35 | 39 | 26 |
| *At*Pep6 |  |  |  |  | **32** | 39 | 39 | 39 | 43 | 43 | 48 | 26 | 39 | 26 | 26 |
| ***Ib*PepI** |  |  |  |  |  | **42** | **42** | **42** | **37** | **37** | **37** | **10** | **5** | **10** | **16** |
| *Nb*Pep6 |  |  |  |  |  |  | 100 | 100 | 65 | 65 | 65 | 26 | 17 | 17 | 13 |
| *Ns*Pep6 |  |  |  |  |  |  |  | 100 | 65 | 65 | 65 | 26 | 17 | 17 | 13 |
| *Nt*Pep6 |  |  |  |  |  |  |  |  | 65 | 65 | 65 | 26 | 17 | 17 | 13 |
| *Sl*Pep6 |  |  |  |  |  |  |  |  |  | 96 | 74 | 26 | 17 | 17 | 13 |
| *St*Pep1 |  |  |  |  |  |  |  |  |  |  | 74 | 26 | 17 | 17 | 13 |
| *Sm*Pep1 |  |  |  |  |  |  |  |  |  |  |  | 30 | 22 | 22 | 17 |
| *At*Pep3 |  |  |  |  |  |  |  |  |  |  |  |  | 35 | 30 | 39 |
| *At*Pep5 |  |  |  |  |  |  |  |  |  |  |  |  |  | 39 | 39 |
| *At*Pep4 |  |  |  |  |  |  |  |  |  |  |  |  |  |  | 39 |
| *At*Pep7 |  |  |  |  |  |  |  |  |  |  |  |  |  |  |  |

*At, Arabidopsis thaliana; Ib, Ipomoea batatas; Nb, Nicotiana benthamiana; Ns, Nicotiana sylvestris; Nt, Nicotiana tomentosiformis; Sl, Solanum lycopersicum; Sm; Solanum melongena; St, Solanum tuberosum.*

**Supplementary Table 3. List of oligonucleotides used for this study.**

| Name | Sequence | Amplification of |
| --- | --- | --- |
| *Ib*LRR-RK1_RT_F | TGGCCCATTTCCTGAGTCTTTAC | real-time PCR |
| *Ib*LRR-RK1_RT_R | GACAGGCAAGGTTCCAACAAGATT |
| *Ib*LRR-RK2_RT_F | GATATGGTTTACAAGGTACGCTCG |
| *Ib*LRR-RK2_RT_R | CTGTGGCGAAGATACAACCCTTT |
| *Ib*LRR-RK3_RT_F | ACTTTCAGGCCACATCCCTC |
| *Ib*LRR-RK3_RT_R | GTGGCCTGAAAGTTGGTTATTGAG |
| *Ib*LRR-RK4_RT_F | ACAGCCTTAATGGGTCAATTCC |
| *Ib*LRR-RK4_RT_R | CCAGACAAGTCTAAGCTCTGAAGA |
| *Ib*LRR-RK5_RT_F | GCATTGTGGGTAGTGTTCCATCC |
| *Ib*LRR-RK5_RT_R | CACCTGCCCTGAGAACCTCAA |
| *Ib*Actin_RT_F | GACTACCATGTTCCCCGGTA |
| *Ib*Actin_RT_R | TTGTATGCCACGAGCATCTT |
| sporamin_RT_F | ATGTCCAAATGCGCCAGCG |
| sporamin_RT_R | TTTCAGGAAATACTGCCCGGA |
| *Ib*WIPK_RT_F | ACATCACCATGGTGGGCG |
| *Ib*WIPK_RT_R | CGTTCAAAGCCGAACAGACGATT |
| *Ib*NAC1_RT_F | CGGCCGGGGATACAAATTTGTAAGCTT |
| *Ib*NAC1_RT_R | GAATCGGAATCCCGGCGGCATCTC |
| *Ib*CML_RT_F | AAGTGGAGAAGGTGTTCAGGAAG |
| *Ib*CML_RT_R | CCTTGTCCTCAGAGTCGGATC |
| *Ib*PROPEP1_FL_F | ATGGAGAAGGGTGGAGAGGA | *Ib*PROPEP1 CDS |
| *Ib*PROPEP1_FL_R | TTAAGAAGAGGTGTCGTTAGTCTGA |
| *Ib*LRR-RK1_FL_F | ATGAAGGTTGCTGTGATCACATTCT | *Ib*LRR-RK CDS |
| *Ib*LRR-RK1_FL_R | CTACTTAGACTTGTTTCTAACACTCGA |
| *Sl*PEPR_FL_F | ATGAAGATAGCTGTTCATAATTTGATCT | *Sl*PEPR CDS |
| *Sl*PEPR_FL_R | CTAGTACTTGCTTCGTATACTCGAA |
| B-5*_*Ib*RK1_fw | tatggtctcaTCTGaacaATGAAGCTTGCTGTGAACATATTC | *Ib*LRR-RK ectodomain  (for GoldenGate) |
| B-5*_*Ib*RK1_rev | ttaggtctcCCgATAACATACTTATCATTTAGGTTC |
| 5*-D_*Ib*RK1_fw | ataggtctcTATcGGGAAGGGAGCACATG | *Ib*LRR-RK kinase  (for GoldenGate) |
| 5*-D_*Ib*RK1_rev | attggtctcTcCTTAGATTTGTTTCTAACACTCGAG |
| B-5*_SYR1_fw | atggtctcATctgaacaATGTTCTTGTTTGATGTTGTTCAT | SYR1 ectodomain  (for GoldenGate) |
| B-5*_SYR1_rev | tatggTCTcCCgATAACATAGTTTTCACTCCAGC |

**REFERENCES**

1 Liu, P. L., Du, L., Huang, Y., Gao, S. M. & Yu, M. Origin and diversification of leucine-rich repeat receptor-like protein kinase (LRR-RLK) genes in plants. *BMC Evol. Biol.* **17**, 16, doi:10.1186/s12862-017-0891-5 (2017).

2 Lori, M. *et al.* Evolutionary divergence of the plant elicitor peptides (Peps) and their receptors: interfamily incompatibility of perception but compatibility of downstream signalling. *J. Exp. Bot.* **66**, 5315-5325, doi:10.1093/jxb/erv236 (2015).

3 Crooks, G. E., Hon, G., Chandonia, J. M. & Brenner, S. E. WebLogo: A sequence logo generator. *Genome Res* **14**, 1188-1190, doi:10.1101/gr.849004 (2004).

4 Nelson, B. K., Cai, X. & Nebenfuhr, A. A multicolored set of in vivo organelle markers for co-localization studies in Arabidopsis and other plants. *Plant Journal* **51**, 1126-1136, doi:10.1111/j.1365-313X.2007.03212.x (2007).
